# Supplementary material for: Big Data, Biomedical Research, and Ethics Review: New Challenges for IRBs
Source: PubMed Central journal article supplement (PMC7814666; doi:10.1002/eahr.500065), 2020-09-16
Supplement: EAHR-42-17-s001.pdf [file EAHR-42-17-s001.pdf]

# Big Data, Biomedical Research, and Ethics

## Review: *New Challenges for IRBs*

AGATA FERRETTI, MARCELLO IENCA, SAMIA HURST, AND EFFY VAYENA

**Figure 1.**  
**Distribution of Documents by Documents' Issuers and Targeted Stakeholder Groups**

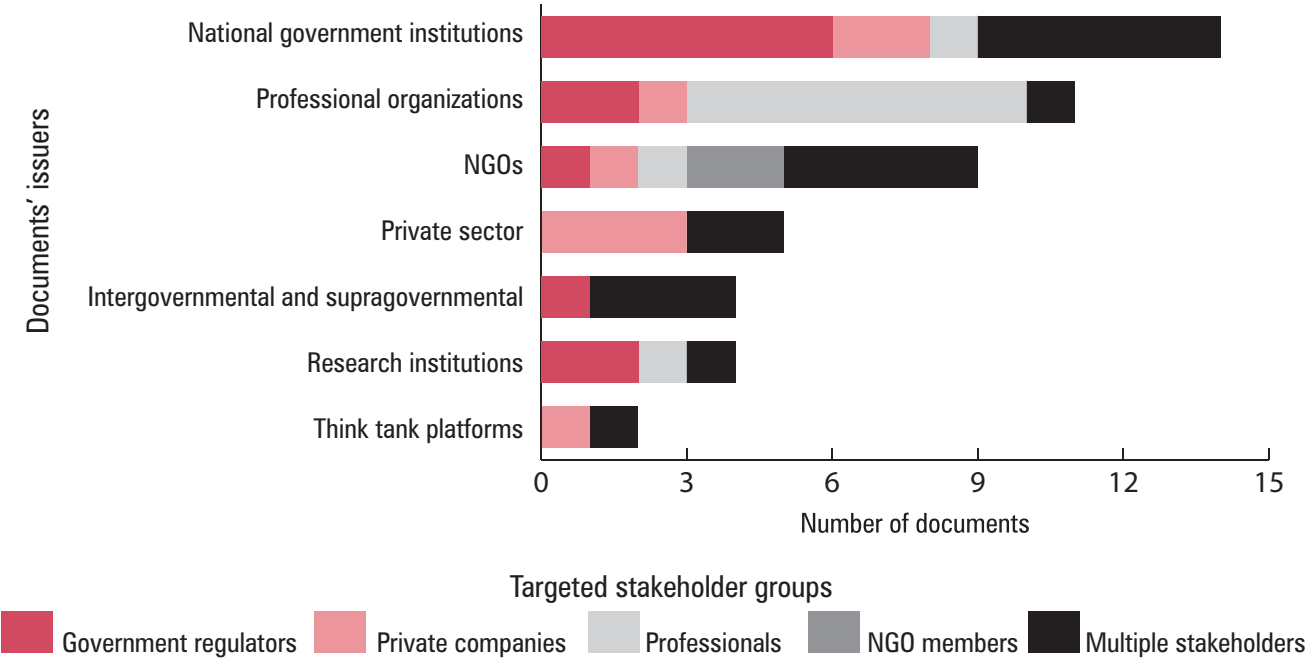

**Figure 2.**  
**Alluvial Diagram Showing the Interconnectedness**  
**across Multiple Themes and Contextual Thematic**  
**Families**

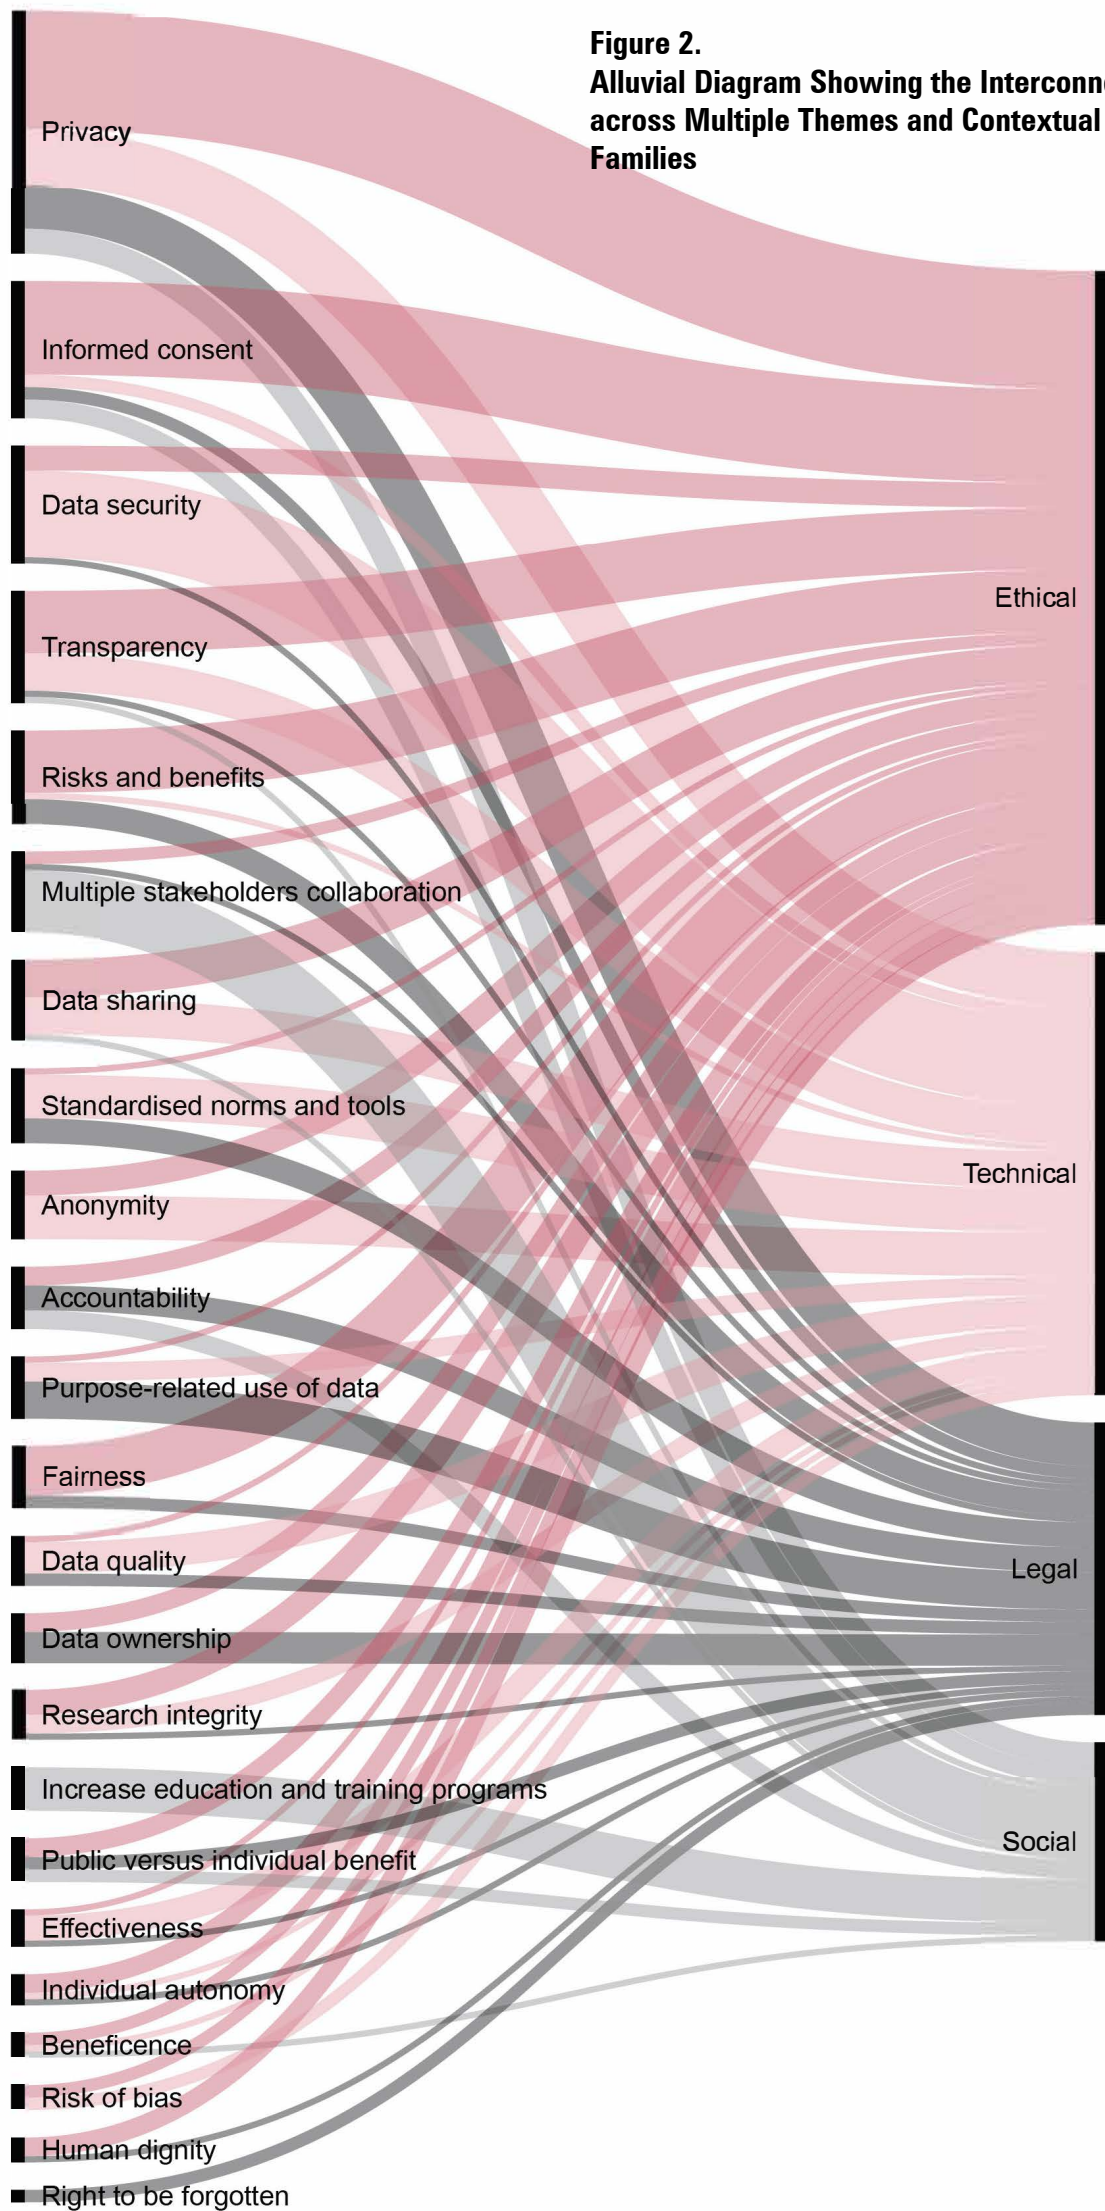

**Figure 3.**  
**Substantive Thematic Families of Recommendations in Big Data Research**

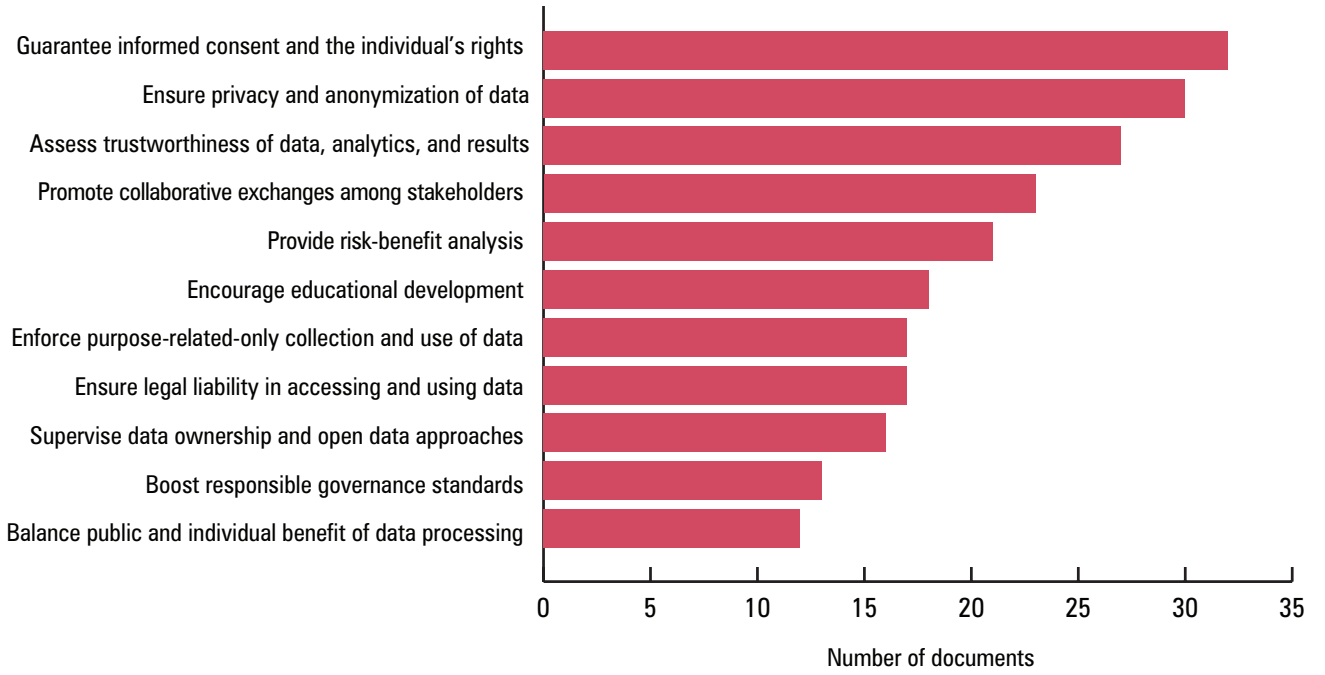

## Appendix 1.

### List of Included Documents

| Title                                                                                                            | Issued by                                                                | Year | Link                                                                                                                                                                                                                                                                                                                                                                                          | Country of Issuer | Type of Issuer                                       | Targeted stakeholder group | Recommendations for IRBs | Prominent health focus |
|------------------------------------------------------------------------------------------------------------------|--------------------------------------------------------------------------|------|-----------------------------------------------------------------------------------------------------------------------------------------------------------------------------------------------------------------------------------------------------------------------------------------------------------------------------------------------------------------------------------------------|-------------------|------------------------------------------------------|----------------------------|--------------------------|------------------------|
| <b>Universal Principles of Data Ethics. 12 Guidelines for Developing Ethics Codes</b>                            | Accenture                                                                | 2016 | <a href="https://www.accenture.com/20160629/012639Z_w/us-en/acnmedia/PDF-24/Accenture-Universal-Principles-Data-Ethics.pdf">https://www.accenture.com/20160629/012639Z_w/us-en/acnmedia/PDF-24/Accenture-Universal-Principles-Data-Ethics.pdf</a>                                                                                                                                             | Ireland           | Private sector                                       | Multiple stakeholders      | Yes                      | No                     |
| <b>Guiding Principles for the Ethical Use of Data</b>                                                            | Axiom Corporation                                                        | 2019 | <a href="https://marketing.axiom.com/rs/982-LRF-196/images/ACX001_EthicalUseofData.pdf">https://marketing.axiom.com/rs/982-LRF-196/images/ACX001_EthicalUseofData.pdf</a>                                                                                                                                                                                                                     | United States     | Private sector                                       | Multiple stakeholders      | No                       | No                     |
| <b>National and Transnational Security Implications of Big Data in the Life Sciences</b>                         | American Association for the Advancement of Science (AAAS)               | 2014 | <a href="https://www.aaas.org/sites/default/files/AAAS-FBI-JNICRI_Big_Data_Report_111014.pdf">https://www.aaas.org/sites/default/files/AAAS-FBI-JNICRI_Big_Data_Report_111014.pdf</a>                                                                                                                                                                                                         | United States     | Professional organization                            | Government regulators      | No                       | Yes                    |
| <b>Ethical Guidelines for Statistical Practice</b>                                                               | American Statistical Association                                         | 2016 | <a href="http://www.amstat.org/asa/files/pdf_s/EthicalGuidelines.pdf">http://www.amstat.org/asa/files/pdf_s/EthicalGuidelines.pdf</a>                                                                                                                                                                                                                                                         | United States     | Professional organization                            | Professionals              | No                       | Yes                    |
| <b>ACM Code of Ethics and Professional Conduct</b>                                                               | Association for Computing Machinery                                      | 2018 | <a href="https://www.acm.org/about-acm/acm-code-of-ethics-and-professional-conduct">https://www.acm.org/about-acm/acm-code-of-ethics-and-professional-conduct</a>                                                                                                                                                                                                                             | Multicountry      | Professional organization                            | Professionals              | No                       | No                     |
| <b>Ethical Decision-Making and Internet Research 2.0. Recommendations from the AoIR Ethics Working Committee</b> | Association of Internet Researchers, Ethics Working Committee            | 2012 | <a href="http://aoir.org/ethics/">http://aoir.org/ethics/</a>                                                                                                                                                                                                                                                                                                                                 | Multicountry      | Professional organization                            | Government regulators      | Yes                      | No                     |
| <b>Big Data Roadmap</b>                                                                                          | Association of the British Pharmaceutical Industry                       | 2013 | <a href="http://www.abpi.org.uk/publications/big-data-roadmap">http://www.abpi.org.uk/publications/big-data-roadmap</a>                                                                                                                                                                                                                                                                       | United Kingdom    | Professional organization                            | Private companies          | No                       | Yes                    |
| <b>Guide to Big Data and the Australian Privacy Principles</b>                                                   | Australian Government, Office of the Australian Information Commissioner | 2016 | <a href="https://www.oaic.gov.au/engage-with-us/consultations/guide-to-big-data-and-the-australian-privacy-principles/consultation-draft-guide-to-big-data-and-the-australian-privacy-principles">https://www.oaic.gov.au/engage-with-us/consultations/guide-to-big-data-and-the-australian-privacy-principles/consultation-draft-guide-to-big-data-and-the-australian-privacy-principles</a> | Australia         | National government institution                      | Multiple stakeholders      | No                       | Yes                    |
| <b>Code of Good Practice</b>                                                                                     | British Computer Science Association                                     | 2011 | <a href="http://www.bcs.org/upload/pdf/cop.pdf">http://www.bcs.org/upload/pdf/cop.pdf</a>                                                                                                                                                                                                                                                                                                     | United Kingdom    | Professional organization                            | Professionals              | No                       | No                     |
| <b>Big Data Roadmap and Cross-Disciplinary Community for Addressing Societal Externalities</b>                   | BYTE Project                                                             | 2014 | <a href="http://new.hyte-project.eu/wp-content/uploads/2014/02/07_3-Final-report-FINAL.pdf">http://new.hyte-project.eu/wp-content/uploads/2014/02/07_3-Final-report-FINAL.pdf</a>                                                                                                                                                                                                             | European Union    | Intergovernmental and supragovernmental institutions | Multiple stakeholders      | No                       | No                     |
| <b>Big Data Analytics in Health. White Paper (Full Report)</b>                                                   | Canada Health Infoway                                                    | 2013 | <a href="https://www.inforoute.ca/en/component/edocman/1246-big-data-analytics-in-health-white-paper-full-report/view-document?Itemid=0">https://www.inforoute.ca/en/component/edocman/1246-big-data-analytics-in-health-white-paper-full-report/view-document?Itemid=0</a>                                                                                                                   | Canada            | NGO                                                  | Multiple stakeholders      | No                       | Yes                    |
| <b>Better Information for Improved Health. A Vision for Health System Use of Data in Canada</b>                  | Canadian Institute for Health Information                                | 2013 | <a href="https://www.cihi.ca/en/hisu_vision_report_en.pdf">https://www.cihi.ca/en/hisu_vision_report_en.pdf</a>                                                                                                                                                                                                                                                                               | Canada            | National government institution                      | Multiple stakeholders      | No                       | Yes                    |
| <b>Health Big Data in the Clinical Context</b>                                                                   | Center for Democracy and Technology                                      | 2015 | <a href="https://cdt.org/files/2015/04/Health-Big-Data-in-the-Clinical-Context.pdf">https://cdt.org/files/2015/04/Health-Big-Data-in-the-Clinical-Context.pdf</a>                                                                                                                                                                                                                             | United States     | NGO                                                  | Private companies          | No                       | Yes                    |

|                                                                                                                          |                                                                              |                     |                                                                                                                                                                                                                                                                                                                         |                |                                                      |                             |     |     |
|--------------------------------------------------------------------------------------------------------------------------|------------------------------------------------------------------------------|---------------------|-------------------------------------------------------------------------------------------------------------------------------------------------------------------------------------------------------------------------------------------------------------------------------------------------------------------------|----------------|------------------------------------------------------|-----------------------------|-----|-----|
| <b>Big Data and Analytics: Seeking Foundations for Effective Privacy Guidance</b>                                        | Centre for Information Policy Leadership                                     | 2013                | <a href="https://www.hunt-on.com/files/Uploads/Documents/News_files/Big_Data_and_Analytics_February_2013.pdf">https://www.hunt-on.com/files/Uploads/Documents/News_files/Big_Data_and_Analytics_February_2013.pdf</a>                                                                                                   | Multicountry   | Think tank platform                                  | Private companies           | No  | Yes |
| <b>Big Data Security and Privacy Handbook: 100 Best Practices in Big Data Security and Privacy</b>                       | Cloud Security Alliance                                                      | 2016                | <a href="https://downloads.cloudsecurityalliance.org/assets/research/big-data/BigData_Security_and_Privacy_Handbook.pdf">https://downloads.cloudsecurityalliance.org/assets/research/big-data/BigData_Security_and_Privacy_Handbook.pdf</a>                                                                             | Multicountry   | NGO                                                  | Private companies           | No  | No  |
| <b>Tecnologie dell'informazione e della comunicazione e big data. Profili bioetici</b>                                   | Presidenza del Consiglio dei Ministri, Comitato Nazionale per la Bioetica    | 2016                | <a href="http://www.quotidianosanita.it/allegati/allegato7545104.pdf">http://www.quotidianosanita.it/allegati/allegato7545104.pdf</a>                                                                                                                                                                                   | Italy          | National government institution                      | Government regulators       | No  | Yes |
| <b>Perspectives on Big Data, Ethics, and Society</b>                                                                     | The Council for Big Data, Ethics, and Society                                | 2016                | <a href="https://brles.datasociety.net/wp-content/uploads/2016/05/Perspectives-on-Big-Data.pdf">https://brles.datasociety.net/wp-content/uploads/2016/05/Perspectives-on-Big-Data.pdf</a>                                                                                                                               | United States  | Research institution                                 | Government regulators       | Yes | No  |
| <b>Guidelines on the Protection of Individuals with Regard to the Processing of Personal Data in a World of Big Data</b> | Council of Europe                                                            | 2017                | <a href="https://rm.coe.int/16806e8e7a?https://rm.coe.int/16806e8e7a">https://rm.coe.int/16806e8e7a?https://rm.coe.int/16806e8e7a</a>                                                                                                                                                                                   | European Union | Intergovernmental and supragovernmental institutions | Multiple stakeholders       | Yes | No  |
| <b>Supporting Ethical Data Research: An Exploratory Study of Emerging Issues in Big Data and Technical Research</b>      | Data & Society                                                               | 2016                | <a href="https://www.datasociety.net/pubs/sedr/SupportingEthicalDataResearch_Sept2016.pdf">https://www.datasociety.net/pubs/sedr/SupportingEthicalDataResearch_Sept2016.pdf</a>                                                                                                                                         | United States  | Research institution                                 | Professionals (researchers) | Yes | No  |
| <b>Data Science Code of Conduct</b>                                                                                      | Data Science Association                                                     | Accessed April 2019 | <a href="http://www.datascienceassn.org/code-of-conduct.html">http://www.datascienceassn.org/code-of-conduct.html</a>                                                                                                                                                                                                   | United States  | Professional organization                            | Professionals               | No  | No  |
| <b>The Menlo Report: Ethical Principles Guiding Information and Communication Technology Research</b>                    | Department of Homeland Security, Center for Applied Internet Data Analysis   | 2012                | <a href="https://www.caida.org/publications/papers/2012/menlo_report_actual_formatted/menlo_report_actual_formatted.pdf">https://www.caida.org/publications/papers/2012/menlo_report_actual_formatted/menlo_report_actual_formatted.pdf</a>                                                                             | United States  | National government institution                      | Multiple stakeholders       | Yes | No  |
| <b>Guidance for Incorporating Big Data into Humanitarian Operations</b>                                                  | Digital Humanitarian Network                                                 | 2015                | <a href="http://digitalhumanitarians.com/sites/default/files/resource-field_media/IncorporatingBigDataintoHumanitarianOps-2015.pdf">http://digitalhumanitarians.com/sites/default/files/resource-field_media/IncorporatingBigDataintoHumanitarianOps-2015.pdf</a>                                                       | Multicountry   | NGO                                                  | NGO members                 | No  | No  |
| <b>The Use of Big Data in Public Health Policy and Research</b>                                                          | European Commission                                                          | 2014                | <a href="https://ec.europa.eu/health/sites/health/files/health/docs/ev_20141118_co07b_en.pdf">https://ec.europa.eu/health/sites/health/files/health/docs/ev_20141118_co07b_en.pdf</a>                                                                                                                                   | European Union | Intergovernmental and supragovernmental institutions | Multiple stakeholders       | No  | Yes |
| <b>Big Data in Healthcare—What Role for the EU?</b>                                                                      | European Health Parliament                                                   | 2017                | <a href="https://www.healthparliament.eu/wp-content/uploads/2017/10/Big-data-in-Healthcare-the-experience-and-results-from-the-European-Health-Parliament.pdf">https://www.healthparliament.eu/wp-content/uploads/2017/10/Big-data-in-Healthcare-the-experience-and-results-from-the-European-Health-Parliament.pdf</a> | European Union | Intergovernmental and supragovernmental institutions | Government regulators       | No  | Yes |
| <b>Big Data. A Tool for Inclusion or Exclusion? Understanding the Issues (FTC Report)</b>                                | Federal Trade Commission                                                     | 2016                | <a href="https://www.ftc.gov/system/files/documents/reports/big-data-tool-inclusion-or-exclusion-understanding-issues/160106big-data-rpt.pdf">https://www.ftc.gov/system/files/documents/reports/big-data-tool-inclusion-or-exclusion-understanding-issues/160106big-data-rpt.pdf</a>                                   | United States  | National government institution                      | Private companies           | No  | No  |
| <b>Benefit-Risk Analysis for Big Data Projects</b>                                                                       | Future of Privacy Forum                                                      | 2014                | <a href="https://fpf.org/wp-content/uploads/FPF_DataBenefitAnalysis_FINAL.pdf">https://fpf.org/wp-content/uploads/FPF_DataBenefitAnalysis_FINAL.pdf</a>                                                                                                                                                                 | United States  | Think tank platform                                  | Multiple stakeholders       | Yes | Yes |
| <b>Health Big Data Recommendations</b>                                                                                   | Health IT Policy Committee, Health Information Technology Advisory Committee | 2015                | <a href="https://www.healthit.gov/sites/default/files/facas/Health_IT_Policy_Report_FINAL.pdf">https://www.healthit.gov/sites/default/files/facas/Health_IT_Policy_Report_FINAL.pdf</a>                                                                                                                                 | United States  | National government institution                      | Government regulators       | Yes | Yes |

|                                                                                                       |                                                    |                     |                                                                                                                                                                                                                                                                                                                                         |                |                                 |                       |     |     |
|-------------------------------------------------------------------------------------------------------|----------------------------------------------------|---------------------|-----------------------------------------------------------------------------------------------------------------------------------------------------------------------------------------------------------------------------------------------------------------------------------------------------------------------------------------|----------------|---------------------------------|-----------------------|-----|-----|
| <b>Ethics for Big Data and Analytics (white paper)</b>                                                | IBM                                                | 2014                | <a href="http://www.ibm.com/ibmdatahub.com/sites/default/files/whitepapers_report_s_file/TCG%20Study%20Report%20-%20Ethics%20for%20BD%26A.pdf">http://www.ibm.com/ibmdatahub.com/sites/default/files/whitepapers_report_s_file/TCG%20Study%20Report%20-%20Ethics%20for%20BD%26A.pdf</a>                                                 | United States  | Private sector                  | Multiple stakeholders | No  | No  |
| <b>Big Data, Artificial Intelligence, Machine Learning and Data Protection</b>                        | Information Commissioner's Office                  | 2017                | <a href="https://ico.org.uk/media/for-organisations/documents/2013559/big-data-ai-ml-and-data-protection.pdf">https://ico.org.uk/media/for-organisations/documents/2013559/big-data-ai-ml-and-data-protection.pdf</a>                                                                                                                   | United Kingdom | National government institution | Private companies     | Yes | Yes |
| <b>IEEE Code of Ethics</b>                                                                            | IEEE                                               | Accessed April 2019 | <a href="http://www.ieee.org/about/corporate/governance/p7-8.html">http://www.ieee.org/about/corporate/governance/p7-8.html</a>                                                                                                                                                                                                         | Multicountry   | Professional organization       | Professionals         | No  | No  |
| <b>Code of Ethics/Conduct</b>                                                                         | INFORM for the Certified Analytics Professional    | Accessed April 2019 | <a href="https://www.certifiedanalytics.org/ethics.php">https://www.certifiedanalytics.org/ethics.php</a>                                                                                                                                                                                                                               | United States  | Professional organization       | Professionals         | No  | No  |
| <b>Big Data Guidelines</b>                                                                            | Information and Privacy Commissioner of Ontario    | 2017                | <a href="https://www.ipc.on.ca/wp-content/uploads/2017/05/bigdata-guidelines.pdf">https://www.ipc.on.ca/wp-content/uploads/2017/05/bigdata-guidelines.pdf</a>                                                                                                                                                                           | Canada         | National government institution | Government regulators | Yes | No  |
| <b>Building Ethics into Privacy Frameworks for Big Data and AI</b>                                    | International Association of Privacy Professionals | 2018                | <a href="https://iapp.org/media/pdf/resource_center/BIUI-DI-NG-ETHICS-INTO-PRIVACY-FRAMEWORKS-FOR-BIG-DATA-AND-AI-UN-Global-Pulse-IAPP.pdf">https://iapp.org/media/pdf/resource_center/BIUI-DI-NG-ETHICS-INTO-PRIVACY-FRAMEWORKS-FOR-BIG-DATA-AND-AI-UN-Global-Pulse-IAPP.pdf</a>                                                       | Multicountry   | Professional organization       | Multiple stakeholders | Yes | No  |
| <b>Location Data Privacy: Guidelines, Assessment &amp; Evaluations</b>                                | Location Forum                                     | 2013                | <a href="https://iapp.org/media/pdf/resource_center/LocationDataPrivacyGuidelines_v2.pdf">https://iapp.org/media/pdf/resource_center/LocationDataPrivacyGuidelines_v2.pdf</a>                                                                                                                                                           | Multicountry   | NGO                             | Multiple stakeholders | No  | Yes |
| <b>Leitlinien für den Big-Data-Einsatz im Überblick Chancen und Verantwortung</b>                     | Nationaler IT-Gipfel                               | 2015                | <a href="https://www.digitale-technologien.de/DT/Redaktion/DE/Downloads/Publikation/Smart_Data_Positionspapier_Big_Data_Leitlinien.pdf?__blob=publicationFile&amp;v=7">https://www.digitale-technologien.de/DT/Redaktion/DE/Downloads/Publikation/Smart_Data_Positionspapier_Big_Data_Leitlinien.pdf?__blob=publicationFile&amp;v=7</a> | Germany        | National government institution | Multiple stakeholders | No  | Yes |
| <b>The Big Data Dilemma</b>                                                                           | Nuffield Council on Bioethics                      | 2015                | <a href="http://nuffieldbioethics.org/wp-content/uploads/Big-Data-dilemma-Nuffield-Council-on-Bioethics-September-2015.pdf">http://nuffieldbioethics.org/wp-content/uploads/Big-Data-dilemma-Nuffield-Council-on-Bioethics-September-2015.pdf</a>                                                                                       | United Kingdom | NGO                             | Government regulators | No  | Yes |
| <b>The Collection, Linking and Use of Data in Biomedical Research and Health Care. Ethical Issues</b> | Nuffield Council on Bioethics                      | 2015                | <a href="http://nuffieldbioethics.org/wp-content/uploads/Biological_and_health_data_web.pdf">http://nuffieldbioethics.org/wp-content/uploads/Biological_and_health_data_web.pdf</a>                                                                                                                                                     | United Kingdom | NGO                             | Multiple stakeholders | Yes | Yes |
| <b>Human Subjects Research Implications of "Big Data" Studies</b>                                     | Office for Human Research Protections              | 2015                | <a href="https://www.hhs.gov/ohrp/sacrp-committee/recommendations/2015-april-24-attachment-a/index.html">https://www.hhs.gov/ohrp/sacrp-committee/recommendations/2015-april-24-attachment-a/index.html</a>                                                                                                                             | United States  | National government institution | Government regulators | Yes | Yes |
| <b>An Enterprise Architect's Guide to Big Data</b>                                                    | Oracle                                             | 2016                | <a href="http://www.oracle.com/technetwork/topics/entarch/articles/oea-big-data-guide-1522052.pdf">http://www.oracle.com/technetwork/topics/entarch/articles/oea-big-data-guide-1522052.pdf</a>                                                                                                                                         | United States  | Private sector                  | Private companies     | No  | Yes |
| <b>The Opportunities and Ethics of Big Data</b>                                                       | Royal Statistical Society                          | 2015                | <a href="http://www.rss.org.uk/Images/PDF/influencing-change/2016/rss-report-ops-and-ethics-of-big-data-feb-2016.pdf">http://www.rss.org.uk/Images/PDF/influencing-change/2016/rss-report-ops-and-ethics-of-big-data-feb-2016.pdf</a>                                                                                                   | United Kingdom | Professional organization       | Professionals         | Yes | No  |
| <b>The Open Data Era in Health and Social Care</b>                                                    | The GovLab (for NHS England)                       | 2014                | <a href="http://images.the.govlab.org/worpdfress/wp-content/uploads/2014/10/nhs-full-report-21.pdf">http://images.the.govlab.org/worpdfress/wp-content/uploads/2014/10/nhs-full-report-21.pdf</a>                                                                                                                                       | United Kingdom | National government institution | Multiple stakeholders | No  | Yes |

|                                                                                          |                                                                                     |      |                                                                                                                                                                                                   |                |                                 |                       |     |     |
|------------------------------------------------------------------------------------------|-------------------------------------------------------------------------------------|------|---------------------------------------------------------------------------------------------------------------------------------------------------------------------------------------------------|----------------|---------------------------------|-----------------------|-----|-----|
| <b>Big Data, Big Possibilities: How Australia Can Use Big Data for Better Healthcare</b> | The McKell Institute                                                                | 2016 | <a href="https://www.allen-s.com.au/pubs/pdf/healthcare/Healthcare-McKellReport.pdf">https://www.allen-s.com.au/pubs/pdf/healthcare/Healthcare-McKellReport.pdf</a>                               | Australia      | Research institution            | Government regulators | No  | Yes |
| <b>Big Data and Data Sharing: Ethical Issues</b>                                         | U.K. Data Service                                                                   | 2017 | <a href="https://www.ukdataservice.ac.uk/media/604711/big-data-and-data-sharing-ethical-issues.pdf">https://www.ukdataservice.ac.uk/media/604711/big-data-and-data-sharing-ethical-issues.pdf</a> | United Kingdom | National government institution | Professionals         | Yes | Yes |
| <b>Data Ethics Framework</b>                                                             | U.K. Government, Cabinet Office                                                     | 2018 | <a href="https://www.gov.uk/government/publications/data-science-ethical-framework">https://www.gov.uk/government/publications/data-science-ethical-framework</a>                                 | United Kingdom | National government institution | Government regulators | No  | No  |
| <b>Integrating Big Data into the Monitoring and Evaluation of Development Programmes</b> | U.N. Global Pulse                                                                   | 2016 | <a href="http://unglobalpulse.org/sites/default/files/Integrating_BigData_intoMED_P_web_11NGP.pdf">http://unglobalpulse.org/sites/default/files/Integrating_BigData_intoMED_P_web_11NGP.pdf</a>   | International  | NGO                             | NGO members           | No  | No  |
| <b>Draft Report on Big Data and Health</b>                                               | UNESCO IBC                                                                          | 2017 | <a href="http://unesdoc.unesco.org/images/0024/002487/248724F.pdf">http://unesdoc.unesco.org/images/0024/002487/248724F.pdf</a>                                                                   | International  | NGO                             | Multiple stakeholders | Yes | Yes |
| <b>The Federal Big Data Research and Development Strategic Plan</b>                      | U.S. Subcommittee on Networking and Information Technology Research and Development | 2016 | <a href="https://www.nitrd.gov/PIRS/bigdatastrategicplan.pdf">https://www.nitrd.gov/PIRS/bigdatastrategicplan.pdf</a>                                                                             | United States  | National government institution | Government regulators | No  | Yes |
| <b>Big Data: Ethische Fragen</b>                                                         | Vodafone Institut für Gesellschaft und Kommunikation                                | 2016 | <a href="http://www.vodafone-institut.de/wp-content/uploads/2016/10/Big-Data_Ethische-Fragen.pdf">http://www.vodafone-institut.de/wp-content/uploads/2016/10/Big-Data_Ethische-Fragen.pdf</a>     | Germany        | Private sector                  | Multiple stakeholders | No  | No  |
| <b>How Should Health Data Be Used? Privacy, Secondary Use, and Big Data Sales</b>        | Yale University, Institution of Social and Policy Studies                           | 2014 | <a href="http://bioethics.yale.edu/sites/default/files/files/ISPS14-025.pdf">http://bioethics.yale.edu/sites/default/files/files/ISPS14-025.pdf</a>                                               | United States  | Research institution            | Multiple stakeholders | No  | Yes |

## Appendix 2.

### Inclusion and Exclusion Criteria for the Literature Review

|                           |           |                                                                                                                                                                                                                                                                                 |
|---------------------------|-----------|---------------------------------------------------------------------------------------------------------------------------------------------------------------------------------------------------------------------------------------------------------------------------------|
| <b>Sources considered</b> | Types     | Documents published online or websites featuring materials such as policy documents, soft-law documents, best-practice guidelines, reports, declarations, technical specifications and standards, technical and commercial documentation, and official recommendation documents |
|                           | Issuers   | National government or international institutions, the private sector (e.g., companies and corporations), NGOs, nonprofit organizations, academic and research institutions, and professional organizations                                                                     |
|                           | Languages | English, Italian, French, German, and Greek (the languages spoken by the authors)                                                                                                                                                                                               |
|                           | Content   | Documents referring to the ethics of big data <i>and</i> providing normative recommendations or best practices                                                                                                                                                                  |
| <b>Sources excluded</b>   | Types     | Blog articles, academic articles, letters to the editors, journalistic articles, legislation, books, conference proceedings, dissertations, videos, images, and audio recordings and podcasts                                                                                   |
|                           | Issuers   | Single authors                                                                                                                                                                                                                                                                  |
|                           | Languages | Others than those mentioned above                                                                                                                                                                                                                                               |
|                           | Content   | Documents that do not mention any ethical topic related to big data <i>or</i> do not provide best practices and recommendations                                                                                                                                                 |



### Appendix 3.

## Substantive Recommendations for IRBs in Relation to the Type of Issuer and the Issuer's Continent

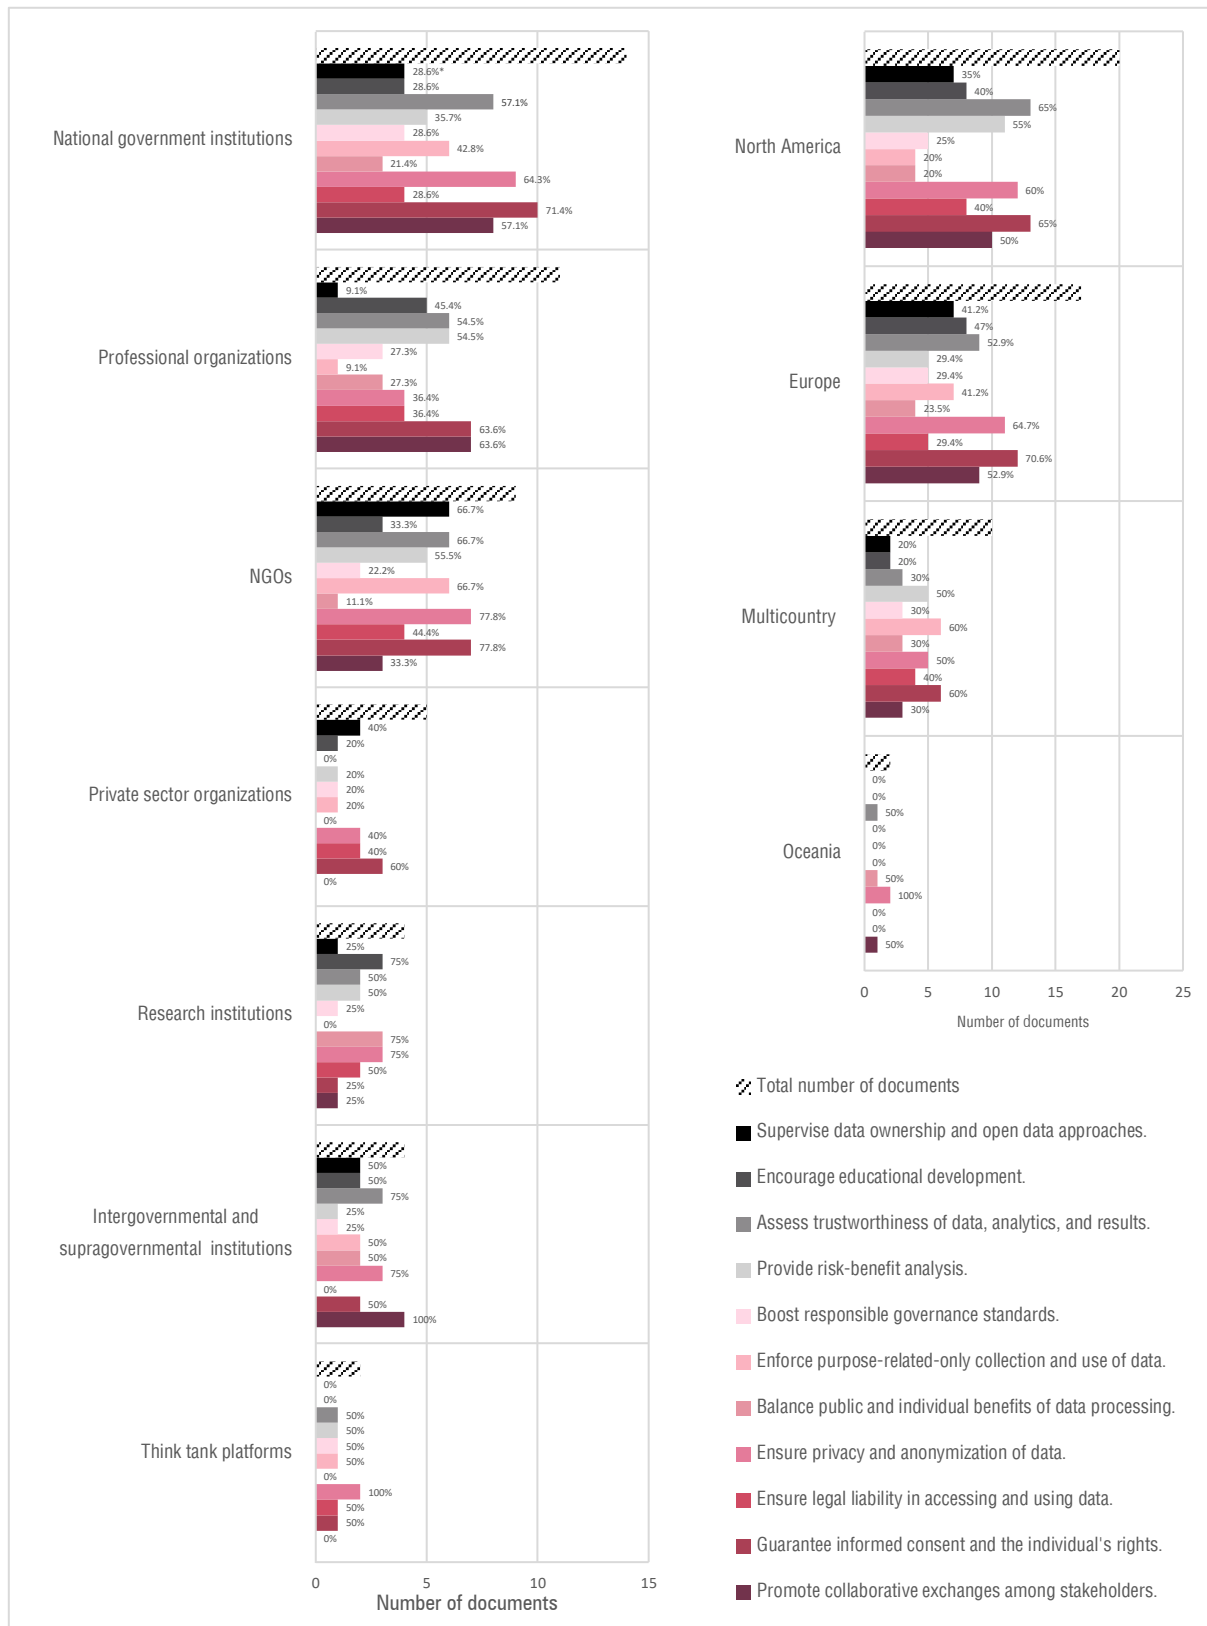

Each percentage refers to the documents within a specific category (e.g., North America or Europe) that mentioned that specific recommendation (e.g., encourage educational development or provide risk-benefit analysis).

\*Our analysis identified few peculiarities concerning the substantive ethical recommendations issued (a) in different continents and (b) by various stakeholders. With respect to different continents, almost 60% of North American documents recommended practicing risk-benefit analysis when using big data for research, compared to 30% of European documents. Furthermore, the topic of enforcing purpose-related-only collection and use of data was only partially discussed within European (40%) and North American (20%) documents compared to international documents (60%). The highest proportion of documents including recommendations on ethical educational development for researchers using big data was provided by European documents. When analyzing with respect to stakeholders, intergovernmental and supragovernmental institutions highlighted—more than any other issuer—the importance of collaborative exchange between stakeholders. Our analysis also showed that 80% of research institutions' documents offered recommendations about balancing public and individual benefits of data processing, compared to the 20% of documents issued by national government institutions. Finally, the data breakdown displayed a lack of substantive recommendations by the private sector. For example, the suggestion to assess the trustworthiness of data, the analytical processes, and the results, is discussed by at least 50% of documents released by every other type of stakeholder, but it is not discussed at all in the documents from the private sector.

#### Appendix 4. Procedural Recommendations for IRBs in Relation to the Type of Issuer

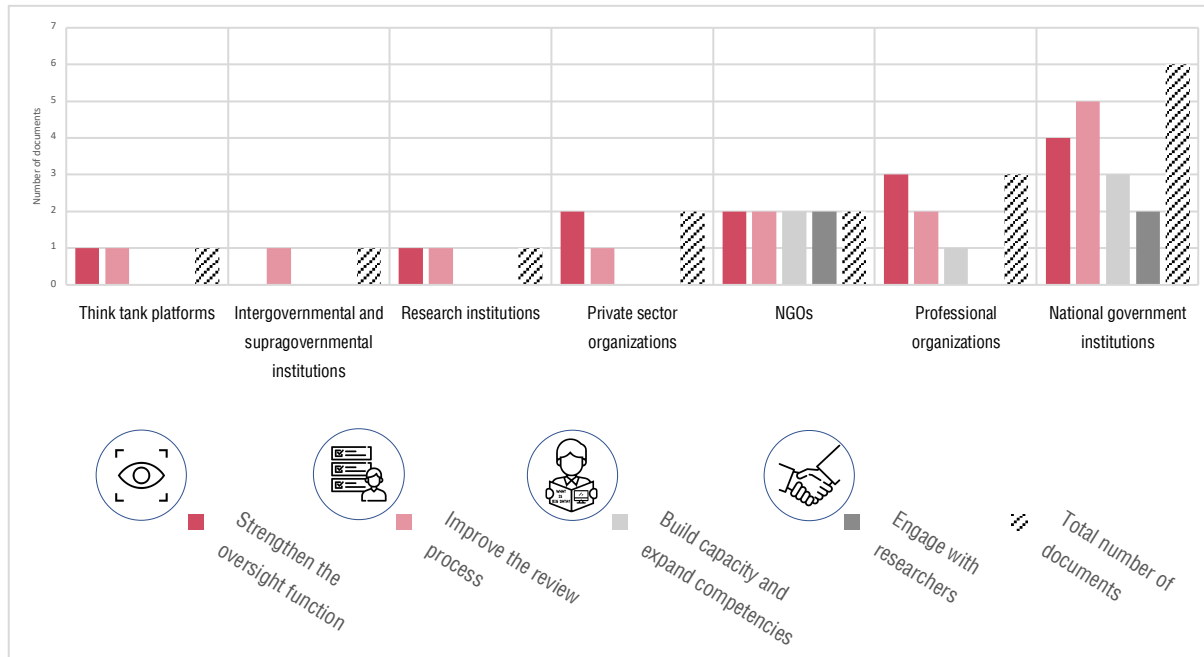

Among all the stakeholders providing procedural recommendations, only national government institutions and research institutions mentioned all four recommendations. In general, there was high heterogeneity across the analyzed documents. For example, none of the documents issued by professional organizations talked about the necessity for IRBs to engage more with researchers, while documents issued by both research institutions and national governments provided this suggestion. Furthermore, the document issued by the private sector focused exclusively on the necessity to strengthen the oversight function of IRBs, while all the other issuers mentioned at least one other recommendation.
